# Supplementary material
Source: PubMed Central journal article supplement (PMC2724003)
Supplement: NIHMS13473-supplement-Supplemental.pdf [file NIHMS13473-supplement-Supplemental.pdf]

# Supplementary Figure 1

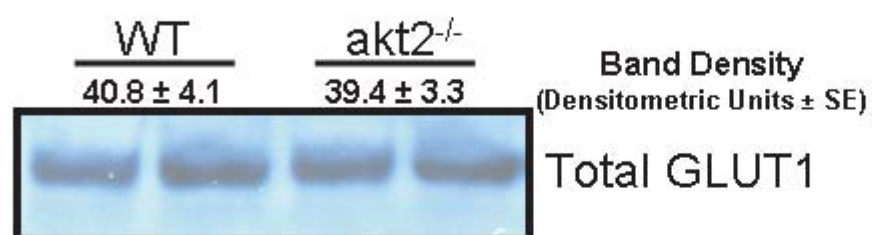

## Supplementary Figure 2

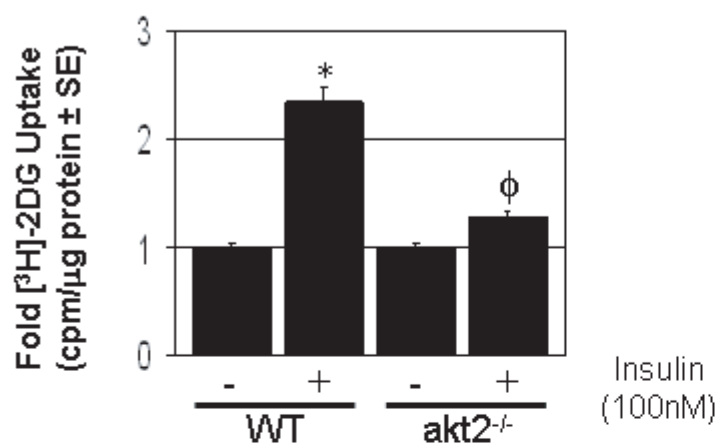

# Supplementary Figure 3

---

|                               | <u>WT</u>     | <u><i>akt2<sup>-/-</sup></i></u> | <u>F-Statistic</u> | <u>P-Value</u> |
|-------------------------------|---------------|----------------------------------|--------------------|----------------|
| <b>n</b>                      | <b>9</b>      | <b>8</b>                         |                    |                |
| HR (min <sup>-1</sup> )       | 276 ± 10      | 271 ± 18                         | 0.063              | 0.806          |
| Peak Systolic Pressure (mmHg) | 64.5 ± 1.7    | 65.7 ± 2.1                       | 0.201              | 0.660          |
| Cardiac Output (ml/min)       | 10.9 ± 0.5    | 10.0 ± 1.0                       | 0.695              | 0.417          |
| Coronary Flow (ml/min)        | 2.5 ± 0.4     | 2.0 ± 0.3                        | 0.959              | 0.343          |
| Cardiac Work (ml*mmHg/min)    | 7.0 ± 0.4     | 6.5 ± 0.5                        | 0.622              | 0.442          |
| Stroke Work (g*meters)        | 0.026 ± 0.001 | 0.025 ± 0.002                    | 0.215              | 0.650          |
| Cardiac Power (joules/min)    | 76.9 ± 4.3    | 70.6 ± 5.6                       | 0.817              | 0.380          |

---

## Supplementary Figure 4

---

|                         | <u>WT</u>   | <u>akt2<sup>-/-</sup></u> | <u>F-Statistic</u> | <u>P-Value</u> |
|-------------------------|-------------|---------------------------|--------------------|----------------|
| n                       | 9           | 13                        |                    |                |
| HR (min <sup>-1</sup> ) | 670 ± 48    | 707 ± 30.4                | 0.198              | 0.053          |
| LVPWd (mm)              | 0.59 ± 0.07 | 0.54 ± 0.05               | 0.233              | 0.077          |
| IVSd(mm)                | 0.62 ± 0.08 | 0.61 ± 0.05               | 0.301              | 0.605          |
| LVIDd (mm)              | 3.24 ± 0.33 | 3.22 ± 0.25               | 0.463              | 0.894          |
| LVPWs (mm)              | 1.37 ± 0.15 | 1.35 ± 0.14               | 0.832              | 0.788          |
| IVSs (mm)               | 1.51 ± 0.22 | 1.57 ± 0.14               | 0.207              | 0.493          |
| LVIDs (mm)              | 1.26 ± 0.30 | 1.14 ± 0.23               | 0.469              | 0.317          |
| LVMI (mg/g)             | 2.74 ± 0.42 | 2.83 ± 0.34               | 0.545              | 0.576          |
| FS (%)                  | 61.2 ± 7.61 | 64.9 ± 5.36               | 0.327              | 0.214          |

---

# Supplementary Figure 5

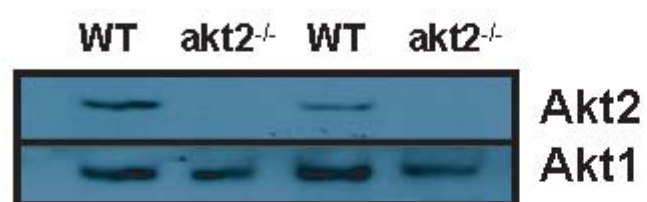

# Supplementary Figure 6

A.

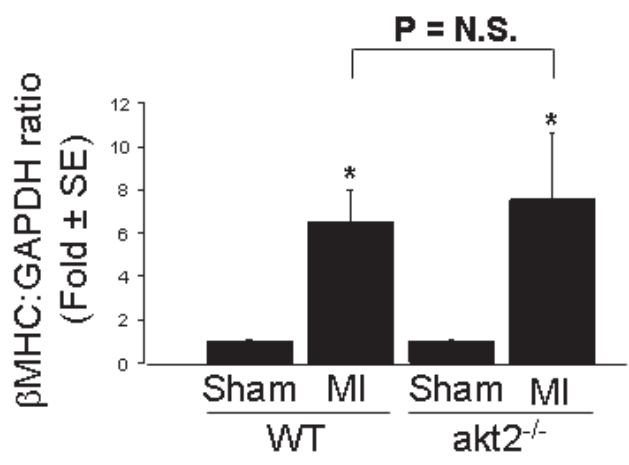

B.

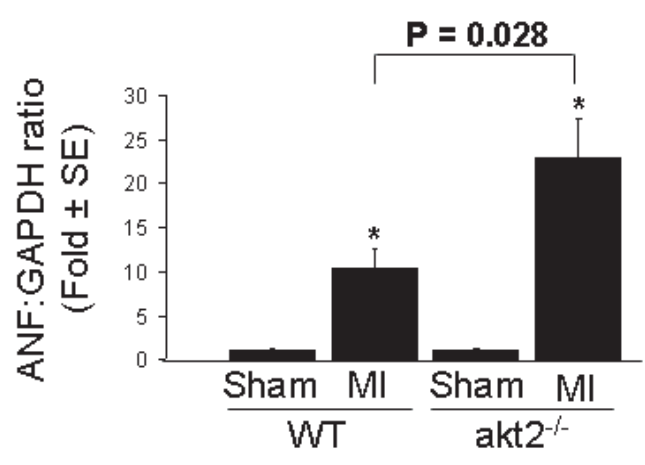

## Supplementary Figure 7

|                   | <b>wt (n=4)</b> | <b>akt2<sup>-/-</sup> (n=5)</b> | <b>P-Value</b> |
|-------------------|-----------------|---------------------------------|----------------|
| <b>SWMSI (1d)</b> | 0.34 ± 0.03     | 0.36 ± 0.05                     | 0.70           |
| <b>EDV (7d)</b>   | 44.0 ± 5.7      | 82.0 ± 12.9                     | 0.043          |
| <b>ESV (7d)</b>   | 25.1 ± 4.4      | 60.5 ± 12.9                     | 0.05           |
| <b>EF (7d)</b>    | 43.8 ± 2.8      | 28.6 ± 4.7                      | 0.032          |
